# Supplementary material for: Influence of nanostructured ceria support on platinum nanoparticles for methanol electrooxidation in alkaline media
Source: Royal Society of Chemistry journal article supplement (doi:10.1039/c3ra45829f), 2013-11-14
Supplement: c3ra45829f.pdf [file c3ra45829f.pdf]

## **Influence of nanostructured ceria support on platinum nanoparticles for methanol electrooxidation in alkaline media**

Yunyun Zhou,<sup>a</sup> Christian L. Menéndez,<sup>b</sup> Maxime J.-F. Guinel,<sup>b, c</sup> Elizabeth C. Needels,<sup>a</sup> Ileana González-González,<sup>b</sup> Dichele L. Jackson,<sup>a</sup> Neil J. Lawrence,<sup>a</sup> Carlos R. Cabrera<sup>b,\*</sup> and Chin Li Cheung<sup>a,\*</sup>

<sup>a</sup> Department of Chemistry, University of Nebraska-Lincoln, Lincoln, NE 68588, USA.

<sup>b</sup> Department of Chemistry and NASA-URC Center for Advanced Nanoscale Materials, University of Puerto Rico, San Juan, Puerto Rico 00936-8377, USA.

<sup>c</sup> Department of Physics, College of Natural Sciences, University of Puerto Rico, San Juan, Puerto Rico 00936-8377, USA.

\*Corresponding authors; e-mails: ccheung2@unl.edu; carlos.cabrera2@upr.edu

### **Electronic Supplemental Information**

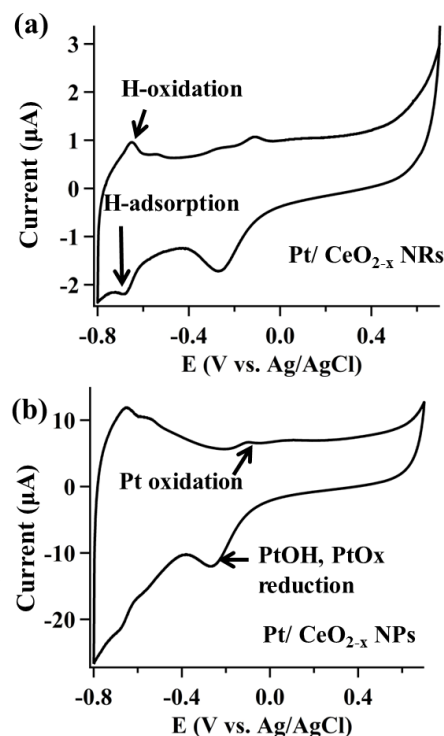

**Fig. S1** Cyclic voltammetry of (a) Pt/ceria NRs and (b) Pt/ceria NPs catalysts in 0.50 M KOH at 50 mV/s. The hydrogen adsorption and Pt oxidation and PtOH reduction are identified.

The Pt active surface area was determined by determining the charge in the hydrogen adsorption potential region.<sup>1,2</sup> Fig. S1 shows the typical CV curves of Pt/ceria in KOH solution. As it is well-known that ceria is not electroactive, peaks between -800 mV and -600 mV vs. Ag/AgCl are attributed to hydrogen adsorption. The large peak at -300 mV vs. Ag/AgCl on the cathodic scan is due to the reduction of Pt-OH and PtO<sub>x</sub> to Pt<sup>0</sup>. The peaks on the anodic scan are due to the formation of Pt hydroxide or oxides species from Pt<sup>0</sup>.<sup>3,4</sup> Typical active Pt surface areas of Pt/ceria NPs catalyst deposited on the glassy carbon (GC) electrodes were about 0.017 cm<sup>2</sup> and that for the Pt/ceria NRs were about 0.0037 cm<sup>2</sup>. Pt/ceria NPs exhibited 4 times more active Pt surface area than that of Pt/ceria NRs, which enabled Pt/ceria NPs to provide more active Pt sites to oxidize methanol in the solution and hence display higher catalytic current density per Pt loading.

**Table S1** The fitting parameters for Pt 4f XPS data of Pt/ceria NRs.

| Peak                                  | Binding Energy (eV) | FWHM (eV) |
|---------------------------------------|---------------------|-----------|
| Pt <sup>0</sup> (4f <sub>7/2</sub> )  | 71.1                | 2.2       |
| Pt-O-M (4f <sub>7/2</sub> )           | 71.7                | 0.6       |
| Pt <sup>2+</sup> (4f <sub>7/2</sub> ) | 72.8                | 1.7       |
| Pt <sup>4+</sup> (4f <sub>7/2</sub> ) | 73.6                | 1.5       |
| Pt <sup>0</sup> (4f <sub>5/2</sub> )  | 74.6                | 1.7       |
| Pt-O-M (4f <sub>5/2</sub> )           | 75.4                | 0.6       |
| Pt <sup>2+</sup> (4f <sub>5/2</sub> ) | 76.1                | 1.4       |
| Pt <sup>4+</sup> (4f <sub>5/2</sub> ) | 77.1                | 1.3       |

**Table S2** The fitting parameters for Pt 4f XPS data of Pt/ceria NPs.

| Peak                                  | Binding Energy (eV) | FWHM (eV) |
|---------------------------------------|---------------------|-----------|
| Pt <sup>0</sup> (4f <sub>7/2</sub> )  | 70.6                | 2.4       |
| Pt-O-M (4f <sub>7/2</sub> )           | 71.9                | 0.4       |
| Pt <sup>2+</sup> (4f <sub>7/2</sub> ) | 72.7                | 2.1       |
| Pt <sup>0</sup> (4f <sub>5/2</sub> )  | 74.1                | 2.0       |
| Pt-O-M (4f <sub>5/2</sub> )           | 75.0                | 0.5       |
| Pt <sup>2+</sup> (4f <sub>5/2</sub> ) | 75.2                | 2.8       |

## References

1. J. M. D. Rodriguez, J. A. H. Melian and J. P. Pena, *J. Chem. Educ.*, 2000, **77**, 1195-1197.
2. F. G. Will, *J. Electrochem. Soc.*, 1965, **112**, 451-455.
3. S. Basu, ed., *Recent Trends in Fuel Cell Science and Technology*, Springer & Anamaya, 2007.
4. L. M. Pan, Z. Y. Zhou, D. J. Chen and S. G. Sun, *Acta Phys-Chim Sin.*, 2008, **24**, 1739-1744.
